1 **Title: A cross-sectional study of low birth satisfaction among Iranian**  
2 **postpartum women during COVID-19 epidemics' fifth wave**

3

4 **Short title: birth satisfaction during COVID-19 pandemic**

5 Forough Mortazavi <sup>1\*</sup>, Maryam Mehrabadi<sup>2</sup>

6 <sup>1</sup>Associate Professor, Non-Communicable Diseases Research Center, Sabzevar University of  
7 Medical Sciences, Sabzevar, Iran Email: frmortazavi@yahoo.com

8 <https://orcid.org/0000-0001-8190-0569>

9 <sup>2</sup>MSc of Midwifery, Health Chancellery, Sabzevar University of Medical Sciences, Sabzevar, Iran

10 Corresponding Information: Forough Mortazavi, Non-Communicable Diseases Research Center,  
11 Sabzevar University of Medical Sciences, Pardis Building, Towhidshahr Blvd, Sabzevar, Iran

12 Email: frmortazavi@yahoo.com Tel: +98(051)44018306

13

## 14 **Abstract**

15 **Background:** Birth dissatisfaction may increase the risk for postpartum depression and requests  
16 for an elective cesarean for the next birth. The outbreak of COVID-19 pandemic has had a  
17 considerable impact on the healthcare systems and their users in many aspects. We investigated  
18 predictors of birth satisfaction in a sample of Iranian postpartum women during the COVID-19  
19 epidemics' fifth wave.

20 **Methods:** This cross-sectional study was conducted on 601 postpartum women admitted to  
21 postpartum wards of Mobini maternity hospital using a convenience sampling method between 2  
22 Aug and 18 September 2021. We collected data on socio-demographic, obstetric, labor and birth,  
23 and psychological variables. We used the general linear model and multiple linear regression  
24 analyses to determine predictors of birth satisfaction.

25 **Results:** The mean birth satisfaction score was  $28.6 \pm 7.3$ . The percentages of mothers who gave  
26 birth by elective and emergency cesarean were 19.5% and 10.8%, respectively. Overall predictors  
27 of birth satisfaction were emergency cesarean [-7.463(-9.310, -5.616), instrumental birth [-3.571(-  
28 6.907, -0.235)], episiotomy [-2.227 ( -3.591, -0.862)], Entonox analgesia [-1.548(-2.726, -0.371)],  
29 Well-being score < 50 [-1.812(-3.146, -0.478)], fear of COVID -19 [-1.216(-2.288,, -0.144)], low  
30 satisfaction with pregnancy -2.539(-3.952, -1.127) and low satisfaction with spouse's support [-  
31 2.419(-4.598, -0.240)].

32 **Conclusions:** During the pandemic, fear of COVID -19, low level of well-being, low satisfaction  
33 with pregnancy and low satisfaction with spouse's support as well as women's experience of  
34 emergency cesarean, instrumental birth, episiotomy, and Entonox analgesia, are exerting negative

35 influences on birth satisfaction. To improve birth satisfaction and thus maternal mental health  
36 interventions to lower fear of contracting COVID -19 and reduce rates of episiotomy, emergency  
37 cesarean, and instrumental birth are recommended.

38 **Keywords:** patient satisfaction, postpartum period, natural childbirth, cesarean section, cross-  
39 sectional study, Iran, COVID-19

40

41

## 42 **Introduction**

43 Childbirth is a turning point in a woman's life that can be either a wonderful experience or a  
44 traumatic one. Although the primary goal of childbirth is the birth of a healthy infant from a healthy  
45 mother, women would generally like it to be a positive and satisfying experience (1). Birth  
46 satisfaction refers to the mother's overall assessment of childbirth and the extent to which she  
47 perceived it as a positive and satisfying experience (2). Studies in developed countries report that  
48 7–10% of women have had a negative birth experience (3).

49 Several studies have found positive association between birth dissatisfaction and a number of  
50 outcomes including postpartum depression (2-4), difficulties in mother-baby bonding, poor  
51 maternal care of the baby and abstaining from exclusive breastfeeding (3). Findings of a study in  
52 New York City hospitals indicate that women with lower birth satisfaction were more likely to  
53 experience higher levels of anxiety, stress, and depressive symptoms during the postpartum period  
54 (4). Birth dissatisfaction may also increase requests for an elective cesarean for the next birth (5)  
55 and the likelihood of mothers delaying their next pregnancy (6). Dissatisfaction with vaginal birth  
56 among women in Hong Kong after their first childbirth resulted in 23.8% of them changing their  
57 preferred mode of birth from vaginal to elective cesarean (5).

58 Several factors have been found to contribute to dissatisfaction with childbirth including  
59 emergency cesarean (5, 7, 8), elective cesarean, higher family income, use of epidural analgesia  
60 (5), induction, unwanted pregnancy (7), primiparity, low level of well-being, low satisfaction with  
61 pregnancy, severe fear of childbirth, long time between hospital admission and giving birth (8),  
62 and lack of support from partner (7, 8). Also, childbirth satisfaction has been found to be associated  
63 with planned childbirth (9), mothers' acquaintance with labor, moderate labor pain (10), women's

64 participation in deciding matters that affect them (11), and empathy and respectful behavior of  
65 caregivers (11, 12).

66 The COVID-19 pandemic has led to increasing rates of anxiety, depression, and stress among  
67 women during pregnancy and childbirth (13-15). Stress was related to constrained antenatal care  
68 during the pandemic, worries about being infected with the virus, the possibility of negative effects  
69 of the infection on the baby, and worry about the health of loved ones (16). Fear of COVID-19 has  
70 been found to be a common problem during the pandemic with a significant impact on women's  
71 well-being (13). It had a statistically significant relationship with depression, suicidal tendencies,  
72 and poor psychological quality of life in pregnant women (17). Studies have also found that, just  
73 as in the pre-pandemic period, dissatisfaction with childbirth during COVID-19 pandemic is  
74 associated with postpartum depression (15, 18). The pandemic has also impacted the organization  
75 and the practices of health care provision in the antenatal, intrapartum, and postnatal periods. It  
76 has also impacted the attitudes and the responses of healthcare users. Factors that might have been  
77 impacted include pregnancy intention, care providers' behavior towards women, more restrictive  
78 hospital rules, the likelihood of experiencing a hassle-free pregnancy, and request for elective  
79 cesarean. It may also have increased households' economic concerns. Therefore, it would not be  
80 unreasonable to expect lower levels of birth satisfaction in women giving birth during COVID-19  
81 pandemic (15).

82 Like many other countries, Iran has experienced high rates of cesarean (19) and maternal requests for  
83 cesarean (20) in recent decades. At the same time, the decreasing total fertility rate (TFR) has been  
84 increasingly viewed as a threat to the future development of the country and thus a cause for concern (21).  
85 Because birth dissatisfaction may increase requests for an elective cesarean for the next birth and the  
86 likelihood of mothers delaying their next pregnancy, there is concerns that the COVID-19 epidemic with

87 its negative impact on birth satisfaction may undermine the Health Transformation Plan (HTP), an initiative  
88 launched by the Iranian government for the reform of the healthcare system in 2014 (22). HTP includes a  
89 number of guidelines and measures with regard to maternity care aiming to promote maternal experience  
90 of childbirth. Thus, we hypothesize that maternal birth experience and childbirth satisfaction might have  
91 been affected by COVID-19 pandemic. In the present study, we investigated the extent to which fear of  
92 COVID -19, maternal well-being status, and labor and birth factors predicted lower birth satisfaction during  
93 the COVID-19 epidemics' fifth wave in Sabzevar, Northeast Iran.

## 94 **Materials and Methods**

### 95 **Design, participants, and data collection**

96 This cross-sectional study was conducted from Aug 2 to September 18, 2021. Women were  
97 recruited in the postpartum and surgery wards of Mobini Hospital affiliated with Sabzevar  
98 University of Medical Sciences. As a matter of hospital policy, they were usually hospitalized for  
99 the first 24 hours and 48 hours after vaginal delivery and cesarean, respectively. Women who had  
100 vaginal deliveries completed the 45-item study questionnaire on the morning of the day after  
101 childbirth when they felt they were ready for the task. In the cesarean group, they filled out the  
102 scales on the morning of the second day after birth. Sampling was done using the convenience  
103 method. Women who gave birth to a healthy, live infant were included in the study. We excluded  
104 women with mental illness under treatment, women with severe postpartum complications, women  
105 with infants admitted to the intensive care unit, those with preterm birth, and COVID-positive  
106 women. Women admitted for birth in the hospital who showed mild signs of COVID were tested  
107 and those with positive results were isolated from other women in labor and postpartum. Women  
108 with severe disease were transferred to another facility dedicated to COVID-19 patients. The  
109 average annual birth rate in the hospital which was 5898 before the COVID -19 outbreak,

110 decreased to 5245 in the first year after the outbreak. There were 4020 births in the first 9 months  
111 of the second year of the pandemic. A research colleague, who was a midwifery graduate,  
112 identified eligible mothers and, if they agreed to participate in the study, presented them with  
113 written consent forms and anonymous questionnaires. We trained the midwife on how to present  
114 the questionnaire and collect the data. Demographic, social, and obstetric information of the  
115 mothers were extracted from their medical records and recorded by the colleague.

### 116 **Ethical consideration**

117 The Ethics Committee of Sabzevar University of Medical Sciences has reviewed and approved  
118 this study (approval number: IR.MEDSAB.REC.1399.103). All procedures were performed in  
119 accordance with the guidelines of Sabzevar University of Medical Sciences, which is in  
120 accordance with the Declaration of Helsinki. Women who consented to participate in the study  
121 signed an informed consent form and were assured about the confidentiality of their information.  
122 After recording the socio-demographic information of the women in the questionnaire, the midwife  
123 asked women to fill out the scales. The questionnaires and scales were anonymous.

### 124 **Instruments**

#### 125 Interview form

126 A three-part questionnaire was completed by the midwife. The first part contained questions on  
127 socio-demographic characteristics (including age, education, residency, and job). The second part  
128 consisted of obstetrical information (such as parity, attending prenatal classes, history of chronic  
129 disease, the desirability of pregnancy, poor obstetric history, infant gender, history of abortion,  
130 and complicated pregnancy). The third part consisted of labor and birth information (such as mode  
131 of birth, induced or spontaneous labor pain, pain relief method during labor and birth, having a

132 private midwife at birth, gestational age, birth weight, admission to birth duration, and  
133 episiotomy/tear repair).

134 The level of satisfaction with pregnancy was assessed based on the extent of health problems  
135 experienced during pregnancy using a five-point Likert scale from 1 to 5 (1 = dissatisfied to 5 =  
136 very satisfied). Women's satisfaction with husband's emotional/financial support and  
137 marital/sexual satisfaction were evaluated with the same scale. A question on receiving fundal  
138 pressure was also included. Women rated their household income as 1= insufficient or 2=  
139 sufficient. (Recorded in a supplementary file 1)

140 To measure birth satisfaction, there are two scales developed for measuring birth experience: the  
141 Birth Satisfaction Scale–Revised (BSS-R) and the Childbirth Experience Questionnaire (CEQ2)  
142 (23). We examined both scales and found similar results with regard to their ability to explain birth  
143 satisfaction variance. We present our results on the CEQ2 in a supplementary file.

144 The Birth Satisfaction Scale–Revised (BSS-R)

145 The Birth Satisfaction Scale–Revised (BSS-R), created by Martin & Martin in 2014, is regarded  
146 as the best instrument for measuring women's birth satisfaction (24). The BSS-R includes 10-items  
147 in three factors: stress experienced during labor, women's personal attributes, and quality of care  
148 provision. Participants were asked to rate each item on a four-point Likert scale which ranges from  
149 0-4 (0 = strongly disagree to 4 = strongly agree). The BSS-R showed acceptable internal  
150 consistency (Cronbach's alpha = 0.79). Its total score ranges from zero to 40. Mortazavi and  
151 colleagues translated the scale into Persian. The validity study of the Persian BSS-R indicted that  
152 it has three dimensions which are identical to those proposed by the developers of the original



153 scale. The reliability of the Persian BSS-R has been confirmed (Cronbach's alpha = 0.76) (25). In  
154 the present study, we calculated a Cronbach's alpha value of 0.734.

155 The World Health Organization's Well-Being Index (WHO-5 Well-Being Index)

156 The 5-item World Health Organization Well-Being Index (WHO-5) assesses the emotional well-  
157 being of individuals over the preceding two weeks. It has five items which are rated using a 6-  
158 point Likert scale where zero represents 'having good feelings at no time' and five represent 'having  
159 good feelings all the time' (26). The scale's total score ranges from 0 to 25 which is converted to a  
160 scale of 0 to 100. The scale is used in screening programs for depression with a score of 50 as the  
161 cut-off point. Individuals with scores less than fifty should be referred for further assessment. The  
162 validity and reliability of the Persian version of WHO-5 in pregnant women were confirmed and  
163 its unidimensionality and reliability was proven (Cronbach's alpha = 0.85) (27). In our study, we  
164 calculated a Cronbach's alpha value of 0.889.

165 Fear of COVID-19 Scale (FCV-19S)

166 The Fear of COVID-19 Scale (FCV-19S) is one of the most widely used scales for assessing fear  
167 of COVID-19. It was developed by Ahorsu et al. (2020) for the purpose of assessing fear of  
168 COVID-19. The scale was translated into Persian and the validity study for the scale was conducted  
169 using a sample of Iranian students (28). It is a unidimensional instrument consisting of 7 items  
170 rated on a 5-point Likert-type scale (1 to 5 points). The total score ranges from 7 to 35 with higher  
171 scores indicating a higher level of fear of COVID-19. A Cronbach's alpha value of 0.88 was  
172 reported in the original study on the scale (28). In our study, we calculated a Cronbach's alpha  
173 value of 0.928.

## 174 **Data analysis**

175 We used the SPSS version 18 to analyze the data. Descriptive statistics were used to characterize  
176 the participants. We evaluated the normal distribution of birth satisfaction scores and other  
177 quantitative variables using skewness and kurtosis. We used the general univariate linear model to  
178 identify independent variables with a significant impact on birth satisfaction scores. Then,  
179 variables with  $p < 0.25$  in the univariate linear regression were entered into five separate multiple  
180 linear regression analyses by the backward-LR method. These analyses enabled us to determine  
181 the demographic, obstetric, labor and birth, psychological, and overall predictors of birth  
182 dissatisfaction. We checked linear regression assumptions. The normality of residuals was verified  
183 and collinearity statistics indicated no multicollinearity (tolerance  $< 1$  and variance inflation factor  
184  $< 2$ ). The effect sizes for the entire model and main predictors of birth satisfaction scores were  
185 calculated.

## 186 **Results**

187 Of the 676 women who gave birth in Mobini hospital during the study period, 67 women were  
188 excluded from the study of whom two women were COVID positive, 27 had a preterm birth, 35  
189 women had an infant in NICU, four women experienced severe postpartum hemorrhage, and eight  
190 women did not consent to participate in the study. Overall, 601 women participated in the study.  
191 The mean value of age (year), education (years), gestational age (week), birth weight (gr), and  
192 admission to delivery duration (hour) were  $28.7 \pm 6.6$ ,  $11.1 \pm 4.1$ ,  $39.1 \pm 1.2$ ,  $3250 \pm 465$ , and  $7.2 \pm 8.0$ ,  
193 respectively. The mean scores of FVC-19S, WHO-5, and birth satisfaction were  $14.7 \pm 7.5$ ,  
194  $69.5 \pm 26.8$ ,  $67.5 \pm 13.0$ , and  $28.6 \pm 7.3$ , respectively. Sixty-five point nine percent (65.9%) of the  
195 participants were multiparous. The correlation between birth satisfaction total scores and the

196 duration between admission to hospital and giving birth was 0.247 ( $p < 0.001$ ). Sample  
 197 characteristics and the results of general linear models for the relationship between the BSS-R  
 198 scores and independent variables are presented in table 1.

199 Table 1. Sample characteristics, mean (SD) of birth satisfaction scores, and the results of general  
 200 linear models on birth satisfaction scores (N = 601).

| Demographic variables     | N (%)      | M (SD) of<br>birth<br>satisfaction<br>scores <sup>€</sup> | Mean difference<br>(95% CI) | P      |
|---------------------------|------------|-----------------------------------------------------------|-----------------------------|--------|
| Age (years)               |            |                                                           |                             |        |
| ≤ 20                      | 70 (11.6)  | 28.3 ± 7.6                                                | Ref                         |        |
| 21-34                     | 405 (67.4) | 28.7 ± 7.3                                                | 0.42 (-1.44, 2.27)          | 0.659  |
| ≥ 35                      | 126 (21.0) | 28.4 ± 7.2                                                | 0.12 (-2.01, 2.25)          | 0.912  |
| Educational level (years) |            |                                                           |                             |        |
| Primary school            | 94 (15.6)  | 29.9 ± 6.7                                                | -2.36 (-4.59, -0.13)        | 0.034* |
| High school               | 335 (55.7) | 28.8 ± 7.6                                                | -1.15 (-3.19, 0.88)         | 0.518  |
| University                | 172 (28.6) | 27.6 ± 6.9                                                | Ref                         |        |
| Job                       |            |                                                           |                             |        |
| Housewife                 | 547 (91.0) | 28.8 ± 7.1                                                | Ref                         | 0.086† |
| Employed                  | 54 (9.0)   | 27.0 ± 8.7                                                | -1.79 (-3.82, 0.025)        |        |
| Household income          |            |                                                           |                             |        |
| Insufficient              | 107 (17.8) | 27.9 ± 8.6                                                | -0.90 (-2.42, 0.63)         | 0.249  |

|                            |            |            |                      |            |
|----------------------------|------------|------------|----------------------|------------|
| Sufficient                 | 494 (82.2) | 28.8 ± 7.0 | Ref                  |            |
| Resident                   |            |            |                      |            |
| Urban                      | 411 (68.4) | 28.1 ± 7.2 | -1.49 (-2.74, 0.24)  | 0.019*†    |
| Rural                      | 190 (31.6) | 29.6 ± 7.3 | Ref                  |            |
| <b>Obstetric variables</b> |            |            |                      |            |
| Parity                     |            |            |                      |            |
| Primipara                  | 205 (34.1) | 26.9 ± 7.4 | -2.62 (-3.83, -1.40) | <0.001***† |
| Multipara                  | 396 (65.9) | 29.6 ± 7.0 | Ref                  |            |
| History of abortion        |            |            |                      |            |
| Yes                        | 176 (29.3) | 28.3 ± 7.4 | -0.38 (-1.66, 0.90)  | 0.558      |
| No                         | 425 (70.7) | 28.7 ± 7.2 | Ref                  |            |
| Infant gender              |            |            |                      |            |
| Female                     | 315 (52.4) | 28.8 ± 6.9 | 0.48 (-0.69, 1.64)   | 0.425      |
| Male                       | 286 (47.6) | 28.4 ± 7.7 | Ref                  |            |
| Complicated pregnancy      |            |            |                      |            |
| Yes                        | 123 (20.5) | 28.1 ± 8.0 | -0.66 (-2.11, 0.79)  | 0.371      |
| No                         | 478 (79.5) | 28.7 ± 7.1 | Ref                  |            |
| Poor obstetric history     |            |            |                      |            |
| Yes                        | 51 (8.5)   | 26.9 ± 8.2 | -1.86 (-3.95, 0.23)  | 0.081†     |
| No                         | 550 (91.5) | 28.8 ± 7.2 | Ref                  |            |
| Chronic disease            |            |            |                      |            |
| Yes                        | 62 (10.3)  | 27.8 ± 8.4 | -0.91 (-2.83, 1.01)  | 0.352      |

|                                 |            |            |                       |            |
|---------------------------------|------------|------------|-----------------------|------------|
| No                              | 539 (89.7) | 28.7 ± 7.1 | Ref                   |            |
| Attending prenatal class        |            |            |                       |            |
| Yes                             | 206 (34.3) | 27.8 ± 7.3 | -1.27 (-2.49, -0.04)  | 0.042*†    |
| No                              | 395 (65.7) | 29.0 ± 7.2 | Ref                   |            |
| <b>Labor and Birth</b>          |            |            |                       |            |
| Gestational age at birth (week) |            |            |                       |            |
| < 38                            | 91 (15.1)  | 29.2 ± 7.9 | 1.07 (-0.81, 2.96)    | 0.263      |
| 38-40                           | 354 (58.9) | 28.7 ± 7.2 | 0.55 (-0.83, 1.92)    | 0.438      |
| > 40                            | 156 (26.0) | 28.1 ± 7.0 | Ref                   |            |
| Birth weight (gr)               |            |            |                       |            |
| 2500-3999                       | 536 (89.2) | 28.8 ± 7.2 | Ref                   |            |
| < 2500                          | 24 (4.0)   | 27.3 ± 8.6 | -1.55 (-4.52, 1.43)   | 0.308      |
| ≥ 4000                          | 41 (6.8)   | 26.3 ± 7.4 | -2.50 (-4.80, -0.19)  | 0.034*†    |
| Mode of birth                   |            |            |                       |            |
| Elective cesarean               | 117 (19.5) | 30.6 ± 5.9 | Ref                   |            |
| Emergency cesarean              | 65 (10.8)  | 23.0 ± 7.9 | -7.59 (-9.70, -5.48)  | <0.001***† |
| Vaginal delivery                | 391 (65.1) | 29.1 ± 7.0 | -1.49 (-2.93, -0.05)  | 0.043*†    |
| VBAC <sup>‡</sup>               | 11 (1.8)   | 29.0 ± 5.7 | -1.07 (-5.92, 2.70)   | 0.464      |
| Instrumental delivery           | 17 (2.8)   | 24.1 ± 8.1 | -6.49 (-10.04, -2.94) | <0.001***† |
| Labor pain                      |            |            |                       |            |
| Spontaneous                     | 306 (50.9) | 29.8 ± 7.4 | Ref                   |            |
| Induced                         | 179 (29.8) | 26.9 ± 7.6 | -1.92 (-3.25, -0.60)  | 0.004***†  |

|                                                    |            |            |                      |            |
|----------------------------------------------------|------------|------------|----------------------|------------|
| Elective cesarean                                  | 116 (19.3) | 30.7 ± 5.9 | 1.86 (0.33, 3.34)    | 0.018*†    |
| Having a private midwife                           |            |            |                      |            |
| Yes                                                | 150 (25.0) | 28.3 ± 7.2 | Ref                  |            |
| No                                                 | 336 (55.9) | 28.0 ± 7.6 | -0.30 (-1.70, 1.10)  | 0.669      |
| Elective cesarean                                  | 115 (19.1) | 30.7 ± 6.0 | -2.34 (-4.10, 0.59)  | 0.009**    |
| Fundal pressure                                    |            |            |                      |            |
| Yes                                                | 308 (51.2) | 28.4 ± 7.3 | -1.99 (-3.57, -0.42) | 0.013*†    |
| No                                                 | 111 (18.5) | 30.4 ± 6.4 | Ref                  |            |
| Cesarean                                           | 182 (30.3) | 27.9 ± 7.6 | -2.48 (-4.19, -0.77) | 0.005**    |
| Suturing                                           |            |            |                      |            |
| Yes – spontaneous tear                             | 193 (32.1) | 29.7 ± 7.1 | -1.12 (-3.02, 0.77)  | 0.245†     |
| Yes – episiotomy                                   | 143 (24.8) | 27.0 ± 7.3 | -3.83 (-5.80, -1.85) | <0.001***† |
| Cesarean                                           | 182 (30.3) | 27.9 ± 7.6 | -2.89 (-4.81, -0.98) | 0.003**    |
| No                                                 | 77 (12.8)  | 30.8 ± 5.9 | Ref                  |            |
| Pain relief method‡                                |            |            |                      |            |
| Cesarean-general analgesia                         | 24 (4.0)   | 29.2 ± 6.7 | -1.16 (-4.38, 2.05)  | 0.478      |
| Cesarean -Spinal analgesia                         | 158 (26.3) | 27.7 ± 7.8 | -2.63 (-4.41, -0.84) | 0.004***†  |
| Vaginal birth-Entonox                              | 291 (48.4) | 28.3 ± 7.1 | -2.01 (-3.62, -0.40) | 0.015*†    |
| Vaginal birth -Hot water shower/massage/birth ball | 22 (3.7)   | 29.9 ± 7.9 | -0.38 (-3.71, 2.96)  | 0.825      |
| Nothing                                            | 106 (17.6) | 30.3 ± 6.7 | Ref                  |            |
| Admission to birth duration (hour)                 |            |            |                      |            |
| < 5                                                | 289 (48.1) | 30.0 ± 6.4 | Ref                  |            |

|                                       |            |                |                      |            |
|---------------------------------------|------------|----------------|----------------------|------------|
| $\geq 5$                              | 312 (51.9) | 27.4 $\pm$ 7.8 | -2.60 (-3.75, -1.46) | <0.001***† |
| <b>Psychological variables</b>        |            |                |                      |            |
| Desirability of pregnancy             |            |                |                      |            |
| Wanted                                | 378 (62.9) | 28.3 $\pm$ 7.0 | Ref                  |            |
| Unplanned                             | 74 (12.3)  | 27.8 $\pm$ 9.0 | -0.474 (-2.29, 1.34) | 0.607      |
| Unwanted                              | 149 (24.8) | 29.7 $\pm$ 7.0 | 1.42 (0.04, 2.80)    | 0.044*†    |
| Fear of COVID-19                      |            |                |                      |            |
| Low fear (< the median score)         | 280 (46.6) | 29.3 $\pm$ 7.6 | Ref                  |            |
| High fear ( $\geq$ the median score)  | 321 (53.4) | 28.0 $\pm$ 6.9 | -1.27 (-2.44, -0.11) | 0.032*†    |
| Well-being index (WHO-5 score)        |            |                |                      |            |
| < 50                                  | 139 (23.1) | 26.7 $\pm$ 7.1 | -2.48 (-3.85, -1.11) | <0.001***† |
| $\geq 50$                             | 462 (76.9) | 29.2 $\pm$ 7.3 | Ref                  |            |
| Satisfaction with pregnancy           |            |                |                      |            |
| Low satisfied                         | 133 (22.1) | 26.6 $\pm$ 8.0 | -3.23 (-4.99, -1.46) | <0.001***† |
| Moderately satisfied                  | 139 (23.1) | 27.8 $\pm$ 6.9 | -2.00 (-3.75, -0.27) | 0.017*†    |
| Satisfied/very satisfied              | 329 (54.7) | 29.8 $\pm$ 6.9 | Ref                  |            |
| Perceived marital/sexual satisfaction |            |                |                      |            |
| Low satisfied                         | 46 (7.6)   | 28.0 $\pm$ 9.3 | -0.72 (-2.93, 1.49)  | 0.521      |
| Moderately satisfied                  | 91 (15.1)  | 28.1 $\pm$ 6.7 | -0.70 (-2.34, 0.94)  | 0.401      |
| Satisfied/very satisfied              | 464 (77.3) | 28.8 $\pm$ 7.2 | Ref                  |            |
| Satisfaction with spouse's support    |            |                |                      |            |
| Low satisfied                         | 40 (6.7)   | 25.7 $\pm$ 9.2 | -3.15 (-5.49, -0.81) | 0.008***†  |

|                                                                                                                                                                                                                                                                                                            |            |            |                     |       |
|------------------------------------------------------------------------------------------------------------------------------------------------------------------------------------------------------------------------------------------------------------------------------------------------------------|------------|------------|---------------------|-------|
| Moderately satisfied                                                                                                                                                                                                                                                                                       | 74 (12.3)  | 28.6 ± 7.0 | -0.30 (-2.07, 1.48) | 0.742 |
| Satisfied/very satisfied                                                                                                                                                                                                                                                                                   | 487 (81.0) | 28.9 ± 7.1 | Ref                 |       |
| <p>†variables entered in the multiple linear regression analysis , ‡vaginal birth after cesarean, §NVD group was included in the analysis,</p> <p>¶higher mean scores are indicative of higher birth satisfaction, the highest and lowest possible scores (0-40), * &lt;0.05, **&lt;0.01, ***&lt;0.001</p> |            |            |                     |       |

201

202 In table 2, the results of multiple linear regression analysis for the birth satisfaction scores are

203 presented. Also, effect sizes for the main predictors of birth satisfaction are included in table 2.

204 Obstetric and labor and birth predictors of birth satisfaction were primiparity [B = -2.650, CI (-

205 3.861, -1.439)], birth weight (gr)  $\geq$  4000 [-2.351(-4.521, -0.180)], emergency cesarean [-7.332 (-

206 9.276, -5.389)], and episiotomy [-2.466 (-3.853, -1.079)]. Psychological predictors of birth

207 satisfaction were unwanted pregnancy [2.292 (.958, 3.625)], Well-being score < 50 [-1.742 (-3.145, -

208 0.338)], low satisfaction with spouse's support [-2.523 (-4.828, -0.219)], and low [-2.910 (-4.400,

209 -1.419)] and moderate [-2.168 (-3.580, -0.755)] satisfaction with pregnancy. Overall predictors of

210 birth satisfaction were emergency cesarean [-7.463(-9.310, -5.616), instrumental delivery [-3.571(-

211 6.907, -0.235)], episiotomy [-2.227 (-3.591, -0.862)], Entonox analgesia [-1.548(-2.726, -0.371)], Well-

212 being score < 50 [-1.812(-3.146, -0.478)], fear of COVID -19 [-1.216(-2.288,, -0.144)], low satisfaction

213 with pregnancy -2.539(-3.952, -1.127) and low satisfaction with spouse's support [-2.419(-4.598, -

214 0.240)]. The overall proportion of the variance in birth satisfaction explained by all variables is

215 17.4% (effect size = 0.174). Labor and birth variables explained 12.2% of the variance in birth

216 satisfaction.

217 Table 2. Results of multiple linear regression analysis on the birth satisfaction scores.

|  |              |  |                         |
|--|--------------|--|-------------------------|
|  | Coefficients |  | Collinearity Statistics |
|--|--------------|--|-------------------------|



|                                   | Beta   | B (95.0% CI)            | P         | Tolerance | VIF   |
|-----------------------------------|--------|-------------------------|-----------|-----------|-------|
| <b>Demographic predictors</b>     |        |                         |           |           |       |
| Primary school vs. University     | 0.073  | 1.464 (-0.280, 3.209)   | 0.100     | 0.836     | 1.196 |
| Urban vs. rural                   | -0.082 | -1.280 (-2.600, 0.041)  | 0.057     | 0.891     | 1.123 |
| Insufficient income               | -0.078 | -1.490 (-3.068, 0.089)  | 0.064     | 0.920     | 1.086 |
| <b>Obstetrics predictors</b>      |        |                         |           |           |       |
| Primiparity                       | -0.173 | -2.650 (-3.861, -1.439) | <0.001*** | 0.999     | 1.001 |
| Poor obstetric history            | -0.077 | -1.998 (-4.057, 0.062)  | 0.057     | 0.999     | 1.001 |
| <b>Labor and birth predictors</b> |        |                         |           |           |       |
| Birth weight (gr) $\geq$ 4000     | -0.082 | -2.351(-4.521, -0.180)  | 0.034*    | 0.996     | 1.004 |
| Instrumental birth                | -0.072 | -3.170 (-6.600, 0.258)  | 0.070     | 0.924     | 1.083 |
| Emergency cesarean                | -0.313 | -7.332 (-9.276, -5.389) | <0.001**  | 0.819     | 1.221 |
| Induced labor pain                | -0.069 | -1.102 (-2.360, 0.156)  | 0.086     | 0.902     | 1.109 |
| Episiotomy repair                 | -0.146 | -2.466 (-3.853, -1.079) | 0.001**   | 0.832     | 1.202 |
| Vaginal birth-Entonox             | -0.078 | -1.142 (-2.385, 0.101)  | 0.072     | 0.774     | 1.293 |
| <b>Psychological predictors</b>   |        |                         |           |           |       |
| Unwanted pregnancy                | 0.136  | 2.292 (0.958, 3.625)    | 0.001**   | 0.958     | 1.044 |
| Well-being score < 50             | -0.101 | -1.742 (-3.145, -0.338) | 0.015*    | 0.907     | 1.103 |

|                                             |        |                         |           |       |       |
|---------------------------------------------|--------|-------------------------|-----------|-------|-------|
| High fear of COVID -19 (scores $\geq$ 13)   | -0.070 | -1.016 (-2.151, -0.119) | 0.079     | 0.991 | 1.009 |
| Low satisfaction with spouse's support      | -0.086 | -2.523 (-4.828, -0.219) | 0.032*    | 0.963 | 1.039 |
| Low satisfaction with pregnancy             | -0.166 | -2.910 (-4.400, -1.419) | <0.001*** | 0.830 | 1.205 |
| Moderate satisfaction with pregnancy        | -0.126 | -2.168 (-3.580, -0.755) | 0.003**   | 0.896 | 1.116 |
| <b>Overall predictors</b>                   |        |                         |           |       |       |
| Emergency cesarean (ref: elective cesarean) | -0.319 | -7.463(-9.310, -5.616)  | <0.001*** | 0.853 | 1.172 |
| Instrumental birth                          | -0.081 | -3.571(-6.907, -0.235)  | 0.036*    | 0.918 | 1.090 |
| Episiotomy repair                           | -0.132 | -2.227 (-3.591, -0.862) | 0.001**   | 0.809 | 1.237 |
| Vaginal birth-Entonox                       | -0.106 | -1.548(-2.726, -0.371)  | 0.010*    | 0.811 | 1.233 |
| Well-being score < 50                       | -0.105 | -1.812(-3.146, -0.478)  | 0.008**   | 0.887 | 1.127 |
| High fear of COVID -19                      | -0.083 | -1.216(-2.288, -0.144)  | 0.026*    | 0.981 | 1.019 |
| Low satisfaction with pregnancy             | -0.145 | -2.539(-3.952, -1.127)  | <0.001*** | 0.816 | 1.225 |
| Low satisfaction with spouse's support      | -0.083 | -2.419(-4.598, -0.240)  | 0.030*    | 0.952 | 1.051 |
| Primary school vs. university               | 0.069  | 1.372(-0.112, 2.856)    | 0.070     | 0.966 | 1.035 |

|                                                                                                                                                                                                                                                                                                                                                                |        |                           |       |       |       |
|----------------------------------------------------------------------------------------------------------------------------------------------------------------------------------------------------------------------------------------------------------------------------------------------------------------------------------------------------------------|--------|---------------------------|-------|-------|-------|
| Unwanted pregnancy                                                                                                                                                                                                                                                                                                                                             | 0.075  | 1.259(-0.028,<br>2.547)   | 0.055 | 0.908 | 1.101 |
| Moderate satisfaction with pregnancy                                                                                                                                                                                                                                                                                                                           | -0.076 | -1.319 (-2.660,<br>0.023) | 0.054 | 0.877 | 1.140 |
| Birth weight (gr) $\geq$ 4000                                                                                                                                                                                                                                                                                                                                  | -0.070 | -2.022(-4.154,<br>0.110)  | 0.063 | 0.971 | 1.029 |
| * <0.05, **<0.01, ***<0.001, Adjusted R square for the first regression analysis= 1.2%, Adjusted R square for the second regression analysis = 3.2%, , Adjusted R square for the third regression analysis = 12.2%, Adjusted R square for the fourth regression analysis = 7.5%, Adjusted R square for the fifth regression analysis = 17.4%, method: backward |        |                           |       |       |       |

218  
219  
220 We investigated the relationship between the presence of a private midwife during labor and fear  
221 of COVID-19 in the case of women who had a vaginal delivery. Women who were accompanied  
222 by a private midwife reported a higher level of fear of COVID-19 than those without a private  
223 midwife ( $p = 0.044$ ). The presence of a private midwife during labor had no relationship with birth  
224 satisfaction scores.

225 In table 3, the distribution of psychological variables including birth satisfaction, well-being, and  
226 fear of COVID-19 according to parity and household income in the pandemic period are presented.  
227 The BSS-R mean scores was higher in multiparas than primiparas ( $p < 0.001$ ). The FVC-19S and  
228 WHO-5 mean scores were not different between multiparas and primiparas ( $p > 0.05$ ). They were  
229 also not different between women with sufficient and insufficient income ( $p > 0.05$ ).

230 Table 3. Mean scores of scales used in the study for different income and parity groups

|        |            | BSS-R <sup>†</sup> | WHO-5 <sup>‡</sup> | FCV-19S <sup>€</sup> |
|--------|------------|--------------------|--------------------|----------------------|
| Parity |            |                    |                    |                      |
|        | Primiparas | 26.8 $\pm$ 7.4     | 71.5 $\pm$ 25.3    | 14.2 $\pm$ 7.1       |
|        | Multiparas | 29.4 $\pm$ 7.0     | 68.4 $\pm$ 27.4    | 14.9 $\pm$ 7.7       |

|                                                                                                                     |              |            |             |            |
|---------------------------------------------------------------------------------------------------------------------|--------------|------------|-------------|------------|
| P                                                                                                                   |              | <0.001***  | 0.159       | 0.299      |
| Income                                                                                                              |              |            |             |            |
|                                                                                                                     | Sufficient   | 28.7 ± 6.9 | 70.1 ± 26.2 | 14.6 ± 7.2 |
|                                                                                                                     | Insufficient | 27.8 ± 8.5 | 66.3 ± 29.3 | 15.0 ± 8.6 |
| P                                                                                                                   |              | 0.314      | 0.183       | 0.634      |
| †birth satisfaction scale-revised, ‡WHO-5 well-being index, € Fear of COVID-19 scale<br>* <0.05, **<0.01, ***<0.001 |              |            |             |            |

231

## 232 Discussion

233

234 We investigated the predictors of birth satisfaction in early postpartum during the COVID-19

235 epidemics' fifth wave in Iran. During the early pandemic, women could not have a companion in

236 the postpartum ward. Also, childbirth preparatory classes were closed and midwives were reluctant

237 to offer their services as private midwives. But after one month the situation improved. Virtual

238 preparatory classes became available and private midwives resumed their services supporting

239 women at birth. The fifth wave of the epidemic, caused by the delta variant, resulted in the highest

240 number of infections and deaths in comparison with previous waves in the country. Although a

241 lockdown was imposed, access to health care facilities was not limited and pregnant women could

242 visit hospitals. They were also allowed to have a private midwife in labor and a companion during

243 postpartum. At this juncture in the COVID-19 pandemic in Iran, vaccination of pregnant women

244 had not yet been begun but almost all midwives had been infected and all had been vaccinated.

245 We explored the role of variables related to labor and birth and also psychological variables in

246 birth satisfaction. Our results indicate that emergency cesarean, instrumental birth, episiotomy,

247 Entonox analgesia, low well-being score, high fear of COVID -19, low satisfaction with pregnancy

248 and a low satisfaction with spouse's support are predictors of lower levels of birth satisfaction.

249 The overall proportion of the variance in birth satisfaction explained by all variables is 17.4%.  
250 Labor and birth variables explained 12.2% of the variance in birth satisfaction.

251 Our results are in line with those of Preis and colleagues (29). They found that in the pandemic  
252 period, established predictors of low birth satisfaction such as nulliparity, mode of birth, social  
253 support, and labor and birth complications explained 35% of the variance in birth satisfaction.  
254 According to the same study, pandemic-related variables including maternal concerns about  
255 preparation for birth and restrictions on the number of family members allowed to accompany a  
256 birthing mother explained 3% of the variance in birth satisfaction (29).

257 We found that fear of contracting COVID-19 during the fifth wave of the disease was a predictor  
258 of lower birth satisfaction. But we expected it to be a stronger predictor of lower birth satisfaction  
259 than our results suggest. Fear of COVID-19 may induce higher anxiety before admission to the  
260 hospital because of uncertainty and unfamiliarity with the hospital setting and the higher risk of  
261 contracting COVID. But during labor and birth, uncertainty and unfamiliarity are diminished and  
262 women feel quite relieved when they are about to be discharged from the hospital in a few hours.

263 Previous studies have found that the level of stress experienced during pregnancy and childbirth  
264 was significantly associated with birth dissatisfaction (15, 18). We found no difference in the levels  
265 of fear of COVID-19 between parity or income groups. This implies that all mentioned groups of  
266 women experienced fear of COVID-19. In contrast, the results of a previous study indicate that fear  
267 of COVID-19 was associated with parity and stage of pregnancy (30).

268 We found that compared to elective cesarean, emergency cesarean and instrumental birth were  
269 better predictors of lower levels of birth satisfaction. This result may be explained by delays and  
270 shortcomings in the implementation of policies and guidelines promoting physiological vaginal

271 birth in our setting. Results from previous studies indicated that cesarean was associated with lower  
272 birth satisfaction in comparison with physiological vaginal birth (4, 8, 18, 29, 31).

273 In our study, women's low level of well-being was a predictor of lower birth satisfaction. We  
274 found similar result in our previous study (8). Comparisons of well-being according to parity and  
275 income indicate that in the pandemic period, well-being mean scores are not different between  
276 parity and income groups. This implies that the pandemic has influenced well-being in both these  
277 groups. In the present study, having a pregnancy that is stressful and characterized by hassle was  
278 a psychological predictor of birth satisfaction. Also, low satisfaction with spouse's support could  
279 predict birth satisfaction. These results are in agreement with the findings of previous studies (8,  
280 32).

281 We found that vaginal birth by episiotomy rather than spontaneous tear is a predictor of birth  
282 satisfaction. In our sample, 24.8 and 32.1 percent of the women experienced episiotomy and  
283 spontaneous tear, respectively. Our study was conducted in a mother friendly hospital and so  
284 episiotomy is not performed as a routine procedure; however, because it is a training hospital,  
285 newly assigned obstetrics residents may perform episiotomy. In a study in Tehran, Iran, vaginal  
286 birth by episiotomy accompanied by tear was a predictor of birth satisfaction (33).

287 Our results indicate that receiving Entonox analgesia is a predictor of lower birth satisfaction.  
288 Entonox analgesia is used for vaginal birth. Our result is not in accord with those reported by  
289 Fumagalli and colleagues. Their findings indicate that none of the intrapartum interventions was  
290 associated with birth satisfaction (34).

291 In our study, having a stressful, hassled pregnancy was a predictor of lower birth satisfaction. Also  
292 low satisfaction with spouse's support could predict lower birth satisfaction. These results are in  
293 agreement with findings of our previous study (8). In a study on 225 postpartum women in Khaf,  
294 Iran, childbirth experience improved with lower hassle and an increased sense of uplift (32).

295 We found that giving birth to an infant with high birth weight is a predictor of lower birth  
296 satisfaction. High birth weight may cause long labor and higher pain levels which are associated  
297 with lower levels of birth satisfaction.

298 We found that none of the socio-demographic variables were related to maternal birth satisfaction.  
299 This is in line with the study by Fumagalli et al. (34) and our previous study (8). Results from the  
300 present study indicate that primiparity is an obstetrical predictor of lower birth satisfaction. This  
301 is in agreement with the results of several previous studies (18, 33, 34). Satisfaction with childbirth  
302 is related to three factors: women's attributes, quality of care received, and stress. Several studies  
303 have shown that multiparas experience lower levels of stress and fear of childbirth because of their  
304 previous birth experience. Also, giving birth to the first child is usually more difficult than the  
305 second or third child. That the satisfaction with current birth is higher in multiparas than primiparas  
306 may be the result of their previous experience which decreases their fear of birth and also makes  
307 delivery easier and more comfortable.

308 We found no relationship between the presence of a private midwife during labor and the birth  
309 satisfaction score. It seems that the role of private midwives in improving birth satisfaction is not  
310 as significant as commonly believed and needs further evaluation. Childbirth preparatory classes  
311 have become increasingly popular among Iranian pregnant women. In prenatal visits, pregnant  
312 women receive the option to register for free childbirth preparatory classes. During the pandemic,

313 virtual classes were held by midwives who work in private practices or public health centers. After  
314 completing the course, participants may opt to have a private midwife during labor, birth, and early  
315 postpartum. Private midwives are permitted to support women during active labor, birth, and early  
316 postpartum. Most of them do not have permission to perform vaginal exams, delivery of the baby,  
317 and other interventions. Obstetrics residents or midwifery students under the supervision of  
318 mentors usually perform the deliveries.

319 We found that women who had a private midwife during labor and birth reported a higher level of  
320 fear of COVID-19. A possible reason for this may be that during the pandemic, women with higher  
321 levels of fear had hired private midwives to receive better care. But because this is a cross-sectional  
322 study, we cannot conclude a causal relationship between the two factors. In a study in Russia, the  
323 rate of having a support person at labor decreased from 58% in the pre-pandemic period to 27% in  
324 the pandemic due to the COVID-19 restrictions (35). Results of a study in the US indicate that the  
325 number of support persons during birth predicted birth satisfaction (29).

### 326 **Limitations and strengths**

327 The main limitation of this study is due to its cross-sectional design which makes it difficult to  
328 establish cause and effect relationships between some variables. The strong points of this study  
329 are the large sample size. We investigated birth satisfaction in the early hours after birth; so, in  
330 comparison with studies that were conducted several months after birth, our results are relatively  
331 more precise. This study was performed using a sample of postpartum women who gave birth in a  
332 conventional birth setting. Its findings cannot be generalized to populations who give birth in  
333 labor-delivery-recovery settings where women are isolated from other parturient and therefore are  
334 less worried about contacting COVID-19.

### 335 **Implications for future research**



336 Data collection for this study was completed before the vaccination of pregnant women against  
337 COVID-19 had started. We recommend that further studies be undertaken in Iran to explore the  
338 effects of vaccination on birth satisfaction. According to our findings, hiring a private midwife  
339 was not associated with higher birth satisfaction. We believe that this finding merits further  
340 exploration and so we recommend that qualitative studies be conducted to explore perspectives of  
341 women and midwives on the role of private midwives.

## 342 **Conclusions**

343 We found that fear of COVID -19 is a predictor of lower birth satisfaction. Our findings also  
344 indicate that variables related to labor and birth were predictors of birth satisfaction. These  
345 variables which were responsible for a large part of the birth satisfaction during the pandemic  
346 include the following: emergency cesarean, instrumental birth, Entonox analgesia, episiotomy, low  
347 level of well-being, low satisfaction with pregnancy, and low satisfaction with husband's support.  
348 Based on our findings we recommend a number interventions to increase birth satisfaction and  
349 thus maternal mental health. Chief among these are interventions to lower fear of contracting  
350 COVID -19 and to reduce rates of episiotomy, emergency cesarean, and instrumental birth.

## 351 **Acknowledgements**

352 We would like to thank pregnant women who participated in this study.

## 353 **References**

- 354 1. Bryanton J, Gagnon AJ, Johnston C, Hatem M. Predictors of Women ' s Perceptions of  
355 the Childbirth Experience. JOGNN. (2008)37 24-34.doi:10.1111/J.1552-6909.2007.00203.x

- 356 2. Karlström A, Nystedt A, Hildingsson I. The meaning of a very positive birth experience:  
357 focus groups discussions with women. *BMC pregnancy and childbirth*.  
358 (2015)15(1):251.doi:10.1186/s12884-015-0683-0
- 359 3. Bell AF, Andersson E, Goding K, Vonderheid SC. The birth experience and maternal  
360 caregiving attitudes and behavior: A systematic review. *Sexual & reproductive healthcare* :  
361 official journal of the Swedish Association of Midwives. (2018)16:67-  
362 77.doi:10.1016/j.srhc.2018.02.007
- 363 4. Janevic T, Maru S, Nowlin S, McCarthy K, Bergink V, Stone J, et al. Pandemic Birthing:  
364 Childbirth Satisfaction, Perceived Health Care Bias, and Postpartum Health During the COVID-  
365 19 Pandemic. *Matern Child Health J*. (2021)25(6):860-9.doi:10.1007/s10995-021-03158-8
- 366 5. Pang MW, Leung TN, Lau TK, Hang Chung TK. Impact of first childbirth on changes in  
367 women's preference for mode of delivery: follow-up of a longitudinal observational study. *Birth*  
368 (Berkeley, Calif). (2008)35(2):121-8.doi:10.1111/j.1523-536X.2008.00225.x
- 369 6. Preis H, Tovim S, Mor P, Grisaru-Granovsky S, Samueloff A, Benyamini Y. Fertility  
370 intentions and the way they change following birth- a prospective longitudinal study. *BMC*  
371 *pregnancy and childbirth*. (2020)20(1):228.doi:10.1186/s12884-020-02922-y
- 372 7. Waldenström U, Hildingsson I, Rubertsson C, Rådestad I. A negative birth experience:  
373 prevalence and risk factors in a national sample. *Birth (Berkeley, Calif)*. (2004)31(1):17-  
374 27.doi:10.1111/j.0730-7659.2004.0270.x
- 375 8. Mortazavi F, Mehrabadi M. Predictors of low birth satisfaction among Iranian  
376 postpartum women: A cross-sectional study. *Nursing Open*. (2022)9(1):604-  
377 13.<https://doi.org/10.1002/nop2.1104>
- 378 9. Tadele M, Bikila D, Fite RO, Obsa MS. Maternal satisfaction towards childbirth Service  
379 in Public Health Facilities at Adama town, Ethiopia. *Reproductive Health*.  
380 (2020)17(1):60.doi:10.1186/s12978-020-00911-0
- 381 10. Jafari E, Mohebbi P, Mazloomzadeh S. Factors Related to Women's Childbirth  
382 Satisfaction in Physiologic and Routine Childbirth Groups. *Iran J Nurs Midwifery Res*.  
383 (2017)22(3):219-24.doi:10.4103/1735-9066.208161
- 384 11. Takacs L, Seidlerova JM, Sulova L, Hoskovcova SH. Social psychological predictors of  
385 satisfaction with intrapartum and postpartum care - what matters to women in Czech maternity  
386 hospitals? *Open medicine (Warsaw, Poland)*. (2015)10(1):119-27.doi:10.1515/med-2015-0022

- 387 12. Pantoja L, Weeks FH, Ortiz J, Cavada G, Foster J, Binfa L. Dimensions of childbirth care  
388 associated with maternal satisfaction among low-risk Chilean women. *Health Care for Women*  
389 *International*. (2020)41(1):89-100.doi:10.1080/07399332.2019.1590360
- 390 13. Mortazavi F, Ghardashi F. The lived experiences of pregnant women during COVID-19  
391 pandemic: a descriptive phenomenological study. *BMC pregnancy and childbirth*.  
392 (2021)21(1):193.doi:10.1186/s12884-021-03691-y
- 393 14. Mollard E, Kupzyk K, Moore T. Postpartum stress and protective factors in women who  
394 gave birth in the United States during the COVID-19 pandemic. *Women's health (London,*  
395 *England)*. (2021)17:17455065211042190.doi:10.1177/17455065211042190
- 396 15. Mariño-Narvaez C, Puertas-Gonzalez JA, Romero-Gonzalez B, Peralta-Ramirez MI.  
397 Giving birth during the COVID-19 pandemic: The impact on birth satisfaction and postpartum  
398 depression. *International Journal of Gynecology & Obstetrics*. (2021)153(1):83-  
399 8.doi.org/10.1002/ijgo.13565
- 400 16. Mortazavi F, Mehrabadi M, KiaeeTabar R. Pregnant women's well-being and worry  
401 during the COVID-19 pandemic: a cross-sectional study. *BMC pregnancy and childbirth*.  
402 (2021)21(1):59.doi:10.1186/s12884-021-03548-4
- 403 17. Ahorsu DK, Imani V, Lin CY, Timpka T, Broström A, Updegraff JA, et al. Associations  
404 Between Fear of COVID-19, Mental Health, and Preventive Behaviours Across Pregnant  
405 Women and Husbands: An Actor-Partner Interdependence Modelling. *Int J Ment Health Addict*.  
406 (2020):1-15.doi:10.1007/s11469-020-00340-x
- 407 18. Urbanová E, Škodová Z, Bašková M. The Association between Birth Satisfaction and the  
408 Risk of Postpartum Depression. *Int J Environ Res Public Health*.  
409 (2021)18(19).doi:10.3390/ijerph181910458
- 410 19. Gibbons L, Belizán JM, Lauer JA, Betrán P, Merialdi M, Althabe F. The Global Numbers  
411 and Costs of Additionally Needed and Unnecessary Caesarean Sections Performed per Year:  
412 Overuse as a Barrier to Universal Coverage Geneva: WHO 2010.
- 413 20. Darsareh F, Aghamolaei T, Rajaei M, Madani A. Determinants of caesarean birth on  
414 maternal demand in the Islamic Republic of Iran: a review. *Eastern Mediterranean Health*  
415 *Journal*. (2017)23(6):441-8.doi: 10.26719/2017.23.6.441

- 416 21. Cincotta R, Sadjadpour K. IRAN IN TRANSITION: The Implications of the Islamic  
417 Republic's Changing Demographics. In: Peace. CEfI, editor. Washington, DC: Carnegie  
418 Endowment for International Peace; (2017).
- 419 22. Moradi-Lakeh M, Vosoogh-Moghaddam A. Health sector evolution plan in Iran; equity  
420 and sustainability concerns. *Int J Health Policy Manag.* (2015)4(10):637-40.doi:  
421 10.15171/ijhpm.2015.160
- 422 23. Walker KF, Dencker A, Thornton JG. Childbirth experience questionnaire 2: Validating  
423 its use in the United Kingdom. *European Journal of Obstetrics & Gynecology and Reproductive*  
424 *Biology: X.* (2020)5:100097.<https://doi.org/10.1016/j.eurox.2019.100097>
- 425 24. Martin CJH, Martin CR. Development and psychometric properties of the Birth  
426 Satisfaction Scale-Revised (BSS-R) Midwifery. (2014)30:610-  
427 9.doi.org/10.1016/j.midw.2013.10.006
- 428 25. Mortazavi F, Mehrabadi M, Hollins Martin CJ, Martin CR. Psychometric properties of  
429 the birth satisfaction scale-revised (BSS-R) in a sample of postpartum Iranian women. *Health*  
430 *Care for Women International.* (2020):1-16.doi:10.1080/07399332.2020.1802464
- 431 26. About the WHO-5.: WHO; 2020 [Available from: [https://www.psykiatri-regionh.dk/who-](https://www.psykiatri-regionh.dk/who-5/about-the-who-5/Pages/default.aspx)  
432 [5/about-the-who-5/Pages/default.aspx](https://www.psykiatri-regionh.dk/who-5/about-the-who-5/Pages/default.aspx). Accessed 15 Dec 2020.
- 433 27. Mortazavi F, Mousavi SA, Chaman R, Khosravi A. Validation of the World Health  
434 Organization-5 Well-Being Index; assessment of maternal well-being and its associated factors.  
435 *Turk psikiyatri dergisi = Turkish journal of psychiatry.* (2015)26(1):1-7
- 436 28. Ahorsu DK, Lin C-Y, Imani V, Saffari M, Griffiths MD, Pakpour AH. The Fear of  
437 COVID-19 Scale: Development and Initial Validation. *International Journal of Mental Health*  
438 *and Addiction.* (2020).doi:10.1007/s11469-020-00270-8
- 439 29. Preis H, Mahaffey B, Heiselman C, Lobel M. The impacts of the COVID-19 pandemic  
440 on birth satisfaction in a prospective cohort of 2,341 U.S. women. *Women and birth : journal of*  
441 *the Australian College of Midwives.* (2021).doi:10.1016/j.wombi.2021.10.004
- 442 30. Giesbrecht GF, Rojas L, Patel S, Kuret V, MacKinnon AL, Tomfohr-Madsen L, et al.  
443 Fear of COVID-19, mental health, and pregnancy outcomes in the pregnancy during the COVID-  
444 19 pandemic study: Fear of COVID-19 and pregnancy outcomes. *Journal of affective disorders.*  
445 (2022)299:483-91.doi.org/10.1016/j.jad.2021.12.057

- 446 31. Kahalon R, Preis H, Benyamini Y. Who benefits most from skin-to-skin mother-infant  
447 contact after birth? Survey findings on skin-to-skin and birth satisfaction by mode of birth.  
448 *Midwifery*. (2021)92:102862.doi:10.1016/j.midw.2020.102862
- 449 32. Khalife-Ghaderi F, Amiri-Farahani L, Haghani S, Hasanpoor-Azghady SB. Examining  
450 the experience of childbirth and its predictors among women who have recently given birth.  
451 *Nursing Open*. (2021)8(1):63-71.doi.org/10.1002/nop2.603
- 452 33. Nahae J, Mohammad-Alizadeh-Charandabi S, Abbas-Alizadeh F, Martin CR, Hollins  
453 Martin CJ, Mirghafourvand M, et al. Pre- and during-labour predictors of low birth satisfaction  
454 among Iranian women: a prospective analytical study. *BMC pregnancy and childbirth*.  
455 (2020)20(1):408.doi:10.1186/s12884-020-03105-5
- 456 34. Fumagalli S, Colciago E, Antolini L, Riva A, Nespoli A, Locatelli A. Variables related to  
457 maternal satisfaction with intrapartum care in Northern Italy. *Women and Birth*.  
458 (2021)34(2):154-61.doi.org/10.1016/j.wombi.2020.01.012
- 459 35. Yakupova V, Suarez A, Kharchenko A. Birth Experience, Postpartum PTSD and  
460 Depression before and during the Pandemic of COVID-19 in Russia. *Int J Environ Res Public*  
461 *Health*. (2021)19(1).doi:10.3390/ijerph19010335

462

463
